# Supplementary material for: The Effectiveness of Virtual Reality Interventions on Smoking, Nutrition, Alcohol, Physical Activity and/or Obesity Risk Factors: A Systematic Review
Source: MDPI journal article supplement (doi:10.3390/ijerph191710821), 2022-08-30
Supplement: s1 [file s1]

**Supplementary Table S1: Search strategy for MEDLINE, Embase, PsycInfo, CENTRAL, and Scopus**

| <b>MEDLINE and Embase</b> |                                           |
|---------------------------|-------------------------------------------|
| 1                         | exp virtual reality/                      |
| 2                         | exp augmented reality/                    |
| 3                         | exp computer simulation/                  |
| 4                         | VR.mp                                     |
| 5                         | Virtual realit*.mp.                       |
| 6                         | simulated 3-D environment.mp              |
| 7                         | monoscopic video.mp                       |
| 8                         | stereoscopic video.mp                     |
| 9                         | avatar*.mp                                |
| 10                        | 1 or 2 or 3 or 4 or 5 or 6 or 7 or 8 or 9 |
| 11                        | exp Smoking/                              |
| 12                        | exp Smoking Cessation/                    |
| 13                        | exp Tobacco/                              |
| 14                        | exp Tobacco Products/                     |
| 15                        | exp "Tobacco Use"/                        |
| 16                        | exp "Tobacco Use Cessation"/              |
| 17                        | exp Nicotine/                             |
| 18                        | smok*.mp                                  |
| 19                        | tobacco.mp                                |
| 20                        | cigar*.mp                                 |
| 21                        | exp Alcohol Drinking/                     |
| 22                        | exp Drinking Behavior/                    |
| 23                        | exp Alcoholism/                           |
| 24                        | alcohol*.mp                               |
| 25                        | alcohol abuse.mp.                         |
| 26                        | exp Diet/                                 |
| 27                        | exp Diet, Healthy/                        |

|    |                                                                                                                                                                                                    |
|----|----------------------------------------------------------------------------------------------------------------------------------------------------------------------------------------------------|
| 28 | exp Diet, Food, and Nutrition/                                                                                                                                                                     |
| 29 | exp Fruit/                                                                                                                                                                                         |
| 30 | exp Vegetables/                                                                                                                                                                                    |
| 31 | diet*.mp                                                                                                                                                                                           |
| 32 | nutrition.mp                                                                                                                                                                                       |
| 33 | exp Exercise/                                                                                                                                                                                      |
| 34 | exp Sedentary Behavior/                                                                                                                                                                            |
| 35 | “physical activit*”.mp                                                                                                                                                                             |
| 36 | “physical inactiv*”.mp                                                                                                                                                                             |
| 37 | exp Obesity/                                                                                                                                                                                       |
| 38 | exp Overweight/                                                                                                                                                                                    |
| 39 | exp Body Weight/                                                                                                                                                                                   |
| 40 | exp Weight Loss/                                                                                                                                                                                   |
| 41 | obes*.mp                                                                                                                                                                                           |
| 42 | weight.mp                                                                                                                                                                                          |
| 43 | “body mass”.mp                                                                                                                                                                                     |
| 44 | 11 or 12 or 13 or 14 or 15 or 16 or 17 or 18 or 19 or 20 or 21 or 22 or 23 or 24 or 25 or 26 or 27 or 28 or 29 or 30 or 31 or 32 or 33 or 34 or 35 or 36 or 37 or 38 or 39 or 40 or 41 or 42 or 43 |
| 45 | exp Randomized Controlled Trial/                                                                                                                                                                   |
| 46 | exp Randomized Controlled Trials as Topic/                                                                                                                                                         |
| 47 | exp Clinical Trial/                                                                                                                                                                                |
| 48 | exp Clinical Trials as Topic/                                                                                                                                                                      |
| 49 | exp Pragmatic Clinical Trial/                                                                                                                                                                      |
| 50 | exp Pragmatic Clinical Trials as Topic/                                                                                                                                                            |
| 51 | exp Random Allocation/                                                                                                                                                                             |
| 52 | random*.mp                                                                                                                                                                                         |
| 53 | RCT*.mp                                                                                                                                                                                            |
| 54 | 45 or 46 or 47 or 48 or 49 or 50 or 51 or 52 or 53                                                                                                                                                 |
| 55 | 10 and 44 and 54                                                                                                                                                                                   |

| PsycInfo |                                           |
|----------|-------------------------------------------|
| 1        | exp virtual reality/                      |
| 2        | exp augmented reality/                    |
| 3        | exp computer simulation/                  |
| 4        | VR.mp                                     |
| 5        | Virtual realit*.mp.                       |
| 6        | simulated 3-D environment.mp              |
| 7        | stereoscopic video.mp                     |
| 8        | monoscopic video.mp                       |
| 9        | avatar*.mp                                |
| 10       | 1 or 2 or 3 or 4 or 5 or 6 or 7 or 8 or 9 |
| 11       | exp Smoking Cessation/                    |
| 12       | exp "Tobacco Use"/                        |
| 13       | exp Nicotine/                             |
| 14       | smok*.mp                                  |
| 15       | tobacco.mp                                |
| 16       | cigar*.mp                                 |
| 17       | exp Drinking Behavior/                    |
| 18       | exp Alcoholism/                           |
| 19       | alcohol*.mp                               |
| 20       | alcohol abuse.mp.                         |
| 21       | exp Fruit/                                |
| 22       | diet*.mp                                  |
| 23       | nutrition.mp                              |
| 24       | exp Exercise/                             |
| 25       | exp Sedentary Behavior/                   |
| 26       | "physical activit*".mp                    |
| 27       | "physical inactiv*".mp                    |
| 28       | exp Obesity/                              |
| 29       | exp Overweight/                           |
| 30       | exp Body Weight/                          |

|                |                                                                                                                                                                                                                                                          |
|----------------|----------------------------------------------------------------------------------------------------------------------------------------------------------------------------------------------------------------------------------------------------------|
| 31             | exp Weight Loss/                                                                                                                                                                                                                                         |
| 32             | obes*.mp                                                                                                                                                                                                                                                 |
| 33             | weight.mp                                                                                                                                                                                                                                                |
| 34             | “body mass”.mp                                                                                                                                                                                                                                           |
| 35             | 11 or 12 or 13 or 14 or 15 or 16 or 17 or 18 or 19 or 20 or 21 or 22 or 23 or 24 or 25 or 26 or 27 or 28 or 29 or 30 or 31 or 32 or 33 or 34                                                                                                             |
| 36             | exp Randomized Controlled Trial/                                                                                                                                                                                                                         |
| 37             | exp Clinical Trial/                                                                                                                                                                                                                                      |
| 38             | random*.mp                                                                                                                                                                                                                                               |
| 39             | RCT*.mp                                                                                                                                                                                                                                                  |
| 40             | 36 or 37 or 38 or 39                                                                                                                                                                                                                                     |
| 41             | 10 and 35 and 40                                                                                                                                                                                                                                         |
| <b>CENTRAL</b> |                                                                                                                                                                                                                                                          |
| 1              | MeSH descriptor: [Virtual Reality] explode all trees                                                                                                                                                                                                     |
| 2              | (virtual NEXT (realit* or environment* or world* or self or avatar)):ti,ab,kw OR (avatar*):ti,ab,kw OR (VR):ti,ab,kw OR ((monoscopic or stereoscopic) NEXT video):ti,ab,kw OR ("simulated 3D environment"):ti,ab,kw (Word variations have been searched) |
| 3              | MeSH descriptor: [Augmented Reality] explode all trees                                                                                                                                                                                                   |
| 4              | MeSH descriptor: [Computer Simulation] explode all trees                                                                                                                                                                                                 |
| 5              | 1 or 2 or 3 or 4                                                                                                                                                                                                                                         |
| 6              | MeSH descriptor: [Smoke] explode all trees                                                                                                                                                                                                               |
| 7              | MeSH descriptor: [Smoking Cessation] explode all trees                                                                                                                                                                                                   |
| 8              | MeSH descriptor: [Tobacco] explode all trees                                                                                                                                                                                                             |
| 9              | MeSH descriptor: [Tobacco Products] explode all trees                                                                                                                                                                                                    |
| 10             | MeSH descriptor: [Tobacco Use] explode all trees                                                                                                                                                                                                         |
| 11             | MeSH descriptor: [Tobacco Use Cessation] explode all trees                                                                                                                                                                                               |
| 12             | MeSH descriptor: [Nicotine] explode all trees                                                                                                                                                                                                            |
| 13             | (smok*):ti,ab,kw OR (tobacco):ti,ab,kw OR (cigar*):ti,ab,kw                                                                                                                                                                                              |
| 14             | MeSH descriptor: [Alcohols] explode all trees                                                                                                                                                                                                            |
| 15             | MeSH descriptor: [Drinking Behavior] explode all trees                                                                                                                                                                                                   |

|                                                                                                                     |                                                                                                                                                |
|---------------------------------------------------------------------------------------------------------------------|------------------------------------------------------------------------------------------------------------------------------------------------|
| 16                                                                                                                  | MeSH descriptor: [Alcohols] explode all trees                                                                                                  |
| 17                                                                                                                  | (alcohol*):ti,ab,kw OR (alcohol NEXT (abuse or misuse or addiction*)):ti,ab,kw                                                                 |
| 18                                                                                                                  | MeSH descriptor: [Diet] explode all trees                                                                                                      |
| 19                                                                                                                  | MeSH descriptor: [Diet, Healthy] explode all trees                                                                                             |
| 20                                                                                                                  | MeSH descriptor: [Diet, Food, and Nutrition] explode all trees                                                                                 |
| 21                                                                                                                  | MeSH descriptor: [Fruit] explode all trees                                                                                                     |
| 22                                                                                                                  | MeSH descriptor: [Vegetables] explode all trees                                                                                                |
| 23                                                                                                                  | (diet*):ti,ab,kw OR (nutrition):ti,ab,kw                                                                                                       |
| 24                                                                                                                  | MeSH descriptor: [Exercise] explode all trees                                                                                                  |
| 25                                                                                                                  | MeSH descriptor: [Sedentary Behavior] explode all trees                                                                                        |
| 26                                                                                                                  | (physical NEXT (activit* or inactiv* or exercise)):ti,ab,kw                                                                                    |
| 27                                                                                                                  | MeSH descriptor: [Obesity] explode all trees                                                                                                   |
| 28                                                                                                                  | MeSH descriptor: [Overweight] explode all trees                                                                                                |
| 29                                                                                                                  | MeSH descriptor: [Weight Loss] explode all trees                                                                                               |
| 30                                                                                                                  | (obes*):ti,ab,kw OR (weight):ti,ab,kw OR ("body mass"):ti,ab,kw                                                                                |
| 31                                                                                                                  | 6 or 7 or 8 or 9 or 10 or 11 or 12 or 13 or 14 or 15 or 16 or 17 or 18 or 19 or 20 or 21 or 22 or 23 or 24 or 25 or 26 or 27 or 28 or 29 or 30 |
| 32                                                                                                                  | MeSH descriptor: [Randomized Controlled Trial] explode all trees                                                                               |
| 33                                                                                                                  | MeSH descriptor: [Randomized Controlled Trials as Topic] explode all trees                                                                     |
| 34                                                                                                                  | MeSH descriptor: [Clinical Trial] explode all trees                                                                                            |
| 35                                                                                                                  | MeSH descriptor: [Clinical Trials as Topic] explode all trees                                                                                  |
| 36                                                                                                                  | MeSH descriptor: [Pragmatic Clinical Trial] explode all trees                                                                                  |
| 37                                                                                                                  | MeSH descriptor: [Pragmatic Clinical Trials as Topic] explode all trees                                                                        |
| 38                                                                                                                  | MeSH descriptor: [Random Allocation] explode all trees                                                                                         |
| 39                                                                                                                  | (random*):ti,ab,kw OR (RCT*):ti,ab,kw                                                                                                          |
| 40                                                                                                                  | 32 or 33 or 34 or 35 or 36 or 37 or 38 or 39                                                                                                   |
| 41                                                                                                                  | 5 and 31 and 40                                                                                                                                |
| <b>Scopus</b>                                                                                                       |                                                                                                                                                |
| VR or virtual* or "virtual reality" or "augmented reality" or avatar AND                                            |                                                                                                                                                |
| RCT or random* or "randomised control*" or "control trial" or "clinical control*" or "cluster randomised trial" AND |                                                                                                                                                |

|                                                                                                      |
|------------------------------------------------------------------------------------------------------|
| Smok* or Smoking or cigarette or "smoking cessation" or tobacco or nicotine OR                       |
| Alcohol or "Alcohol use disorder" or "substance abuse" or alcohol* or "substance abuse" OR           |
| nutrition* or "healthy eating" or diet* or "healthy food" or nutrient or "fruit and vegetable" OR    |
| "weight loss" or exercise or "physical activity" or weigh* or obesity or overweight or "body weight" |
